# Supplementary material for: Mutation of a single residue promotes gating of vertebrate and invertebrate two-pore domain potassium channels
Source: PubMed Central journal article supplement (PMC6377628; doi:10.1038/s41467-019-08710-3), 2019-02-15
Supplement: 41467_2019_8710_MOESM1_ESM.pdf [file 41467_2019_8710_MOESM1_ESM.pdf]

Supplementary Information

**Mutation of a single residue promotes gating of vertebrate and invertebrate two-pore domain potassium channels**

Ben Soussia\*, El Mouridi\*, *et al.*

*Nature Communications* (2019)



Supplementary Figure 1 - continued.

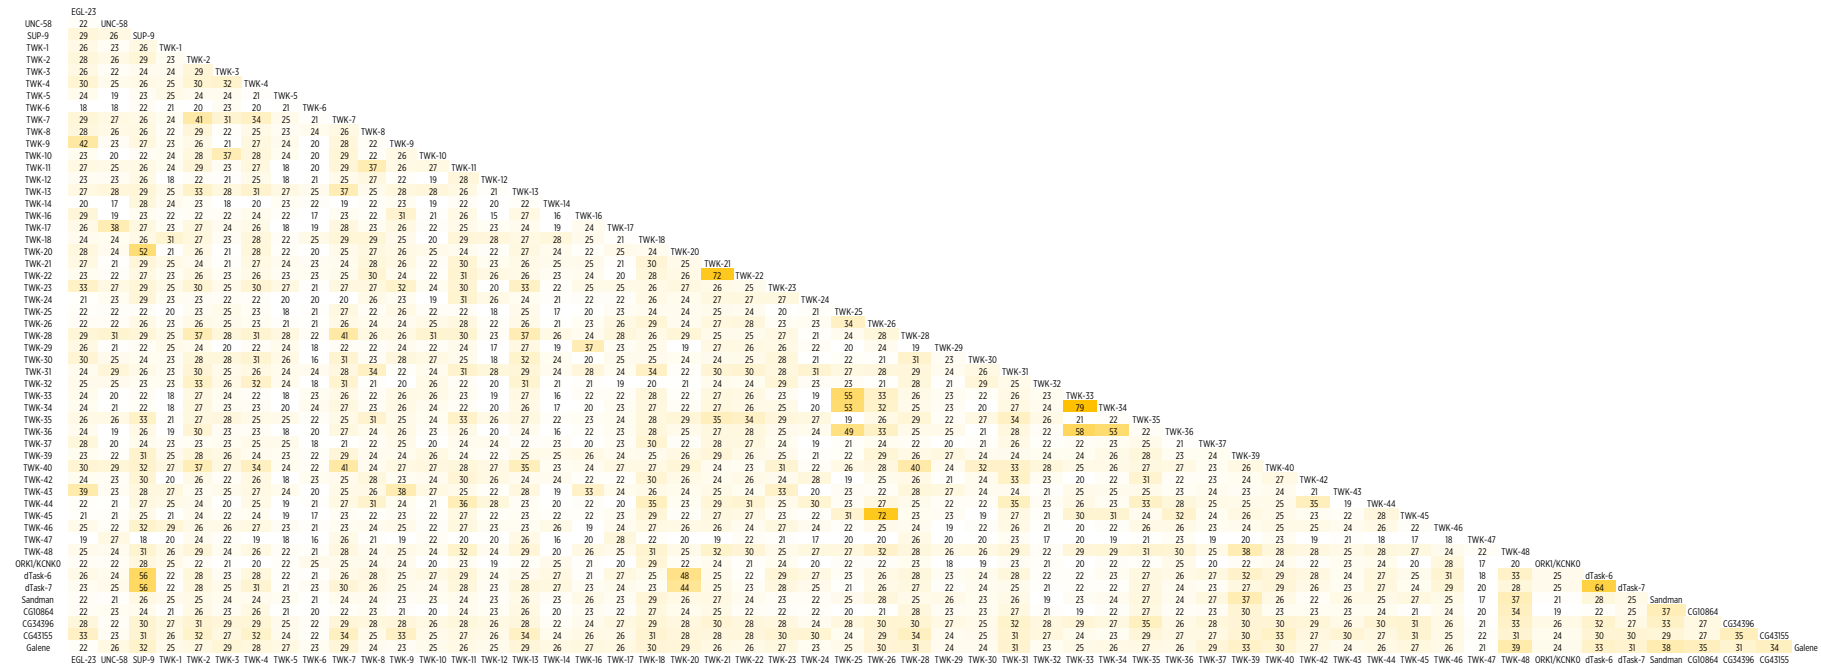

TWK1, NP\_002236 ; TWK2, NP\_004814 ; TRAAK, NP\_201567 ; TREK1, NP\_001017425 ;  
 TREK2, NP\_612190 ; TASK1, NP\_002237 ; TASK3, NP\_001269463 ; TASK5, NP\_071753 ;  
 TASK2, NP\_003731 ; TALK1, NP\_001128578 ; TALK2, AAH25726 ; TRESK, NP\_862823 ;  
 THIK1, NP\_071337 ; THIK2, NP\_071338 ; KCNK7, NP\_203133 ; EGL-23, NP\_001255776 ;  
 UNC-58, NP\_741880 ; SUP-9, NP\_494333 ; TWK-1, NP\_492054 ; TWK-2, NP\_494786 ;  
 TWK-3, NP\_495727 ; TWK-4, NP\_001343566 ; TWK-5, NP\_001021895 ; TWK-6, NP\_497973 ;  
 TWK-7, NP\_498903 ; TWK-8, NP\_001023596 ; TWK-9, NP\_501724 ; TWK-10,  
 NP\_001300134 ; TWK-11, NP\_001343632 ; TWK-12, NP\_505731 ; TWK-13, NP\_506091 ;  
 TWK-14, NP\_001256414 ; TWK-16, NP\_508526 ; TWK-17, NP\_001024466 ; TWK-18,  
 NP\_509516 ; TWK-20, NP\_510284 ; TWK-21, NP\_510654 ; TWK-22, NP\_510655 ; TWK-23,  
 NP\_001257229 ; TWK-24, AAC32865 ; TWK-25, NP\_502170 ; TWK-26, NP\_508522 ; TWK-  
 28, NP\_508732 ; TWK-29, NP\_001021467 ; TWK-30, NP\_492381 ; TWK-31, NP\_001022883  
 ; TWK-32, NP\_506416 ; TWK-33, NP\_001309463 ; TWK-34, NP\_506906 ; TWK-35,  
 NP\_508031 ; TWK-36, NP\_507485 ; TWK-37, NP\_491810 ; TWK-39, NP\_001076639 ; TWK-  
 40, NP\_001255207 ; TWK-42, NP\_507483 ; TWK-43, NP\_872137 ; TWK-44, NP\_509942 ;  
 TWK-45, NP\_001122742 ; TWK-46, NP\_741678 ; TWK-47, NP\_001309491 ; TWK-48,  
 NP\_001022681 ; ORR1/KCNKO, NP\_511112 ; dTask-6, NP\_001262539 ; dTask-7,  
 NP\_649891 ; sandman, NP\_610349 ; CG10864, NP\_650726 ; CG34396, NP\_001097392 ;  
 CG43155, NP\_572720

# Supplementary Figure 2

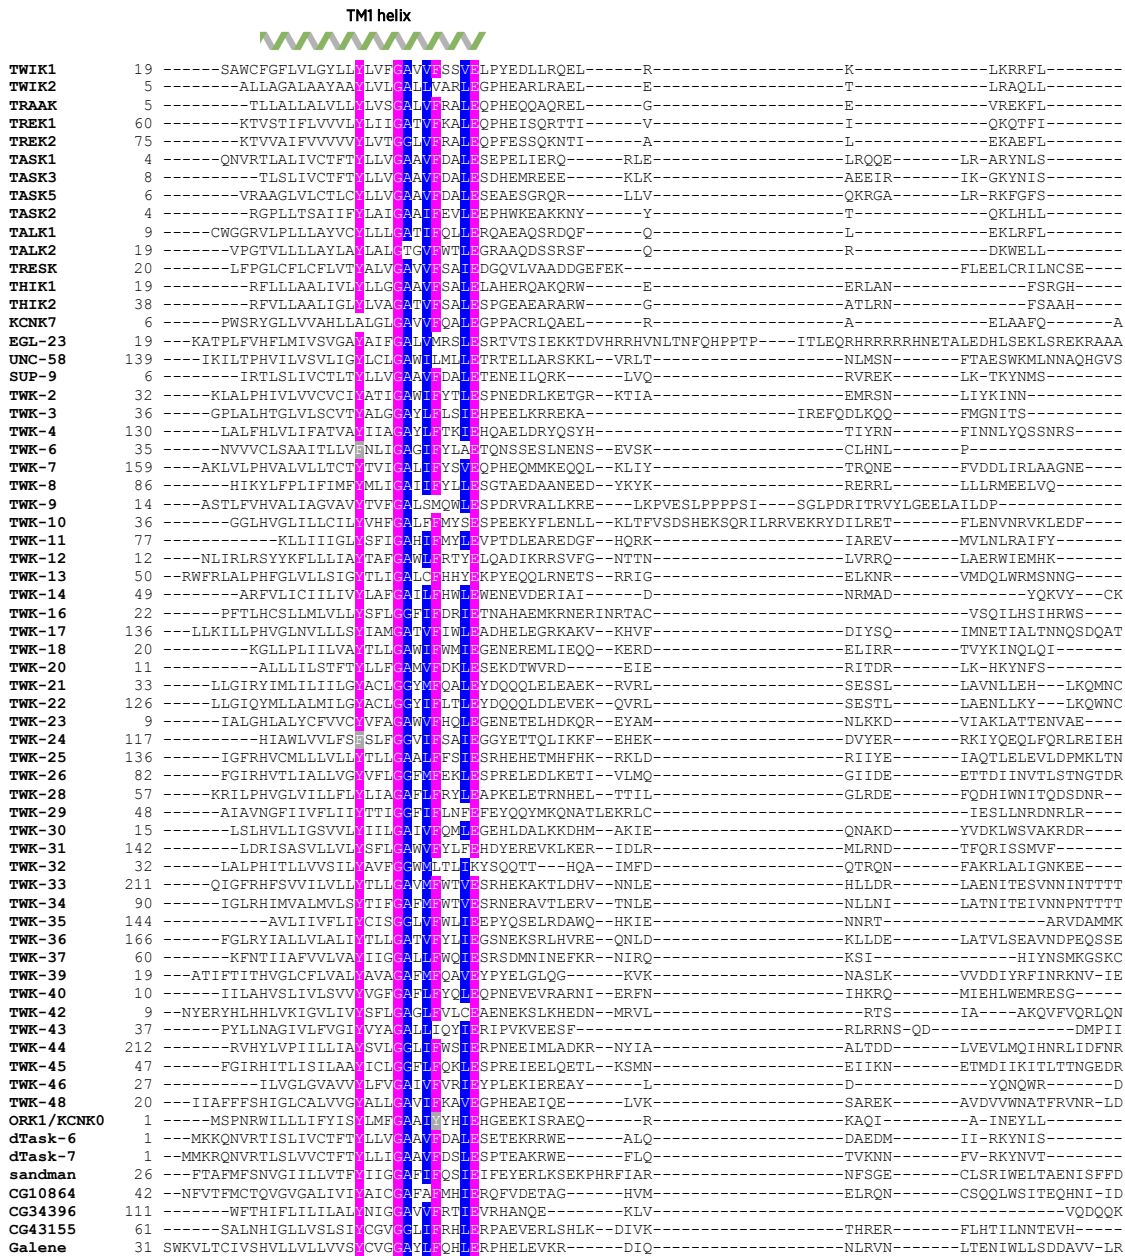

Supplementary Figure 2 - Clustal Omega alignment of human, *C. elegans*, and *D. melanogaster* two-pore domain potassium channel sequences.

Genbank identifiers for aligned sequences are listed below. N- and C-terminal cytoplasmic portions were truncated before alignment. Cartoon representations on top mark the four transmembrane helix regions (TM1, TM2, TM3, and TM4), two pore helix domains (Ph1 and Ph2), and two selectivity filters (SF1 and SF2). Sequence logos were generated using WebLogo 3 (Crooks et al., 2004). Highly conserved residues are indicated in *hotpink* and well conserved residues in *maroon*, as in Figure 1.

TWIK1, NP\_002236 ; TWIK2, NP\_004814 ; TRAAK, NP\_201567 ; TREK1, NP\_001017425 ; TREK2, NP\_612190 ; TASK1, NP\_002237 ; TASK3, NP\_001269463 ; TASK5, NP\_071753 ; TASK2, NP\_003731 ; TALK1, NP\_001128578 ; TALK2, AAH25726 ; TRESK, NP\_862823 ; THIK1, NP\_071337 ; THIK2, NP\_071338 ; KCNK7, NP\_203133 ; EGL-23, NP\_001255776 ; UNC-58, NP\_741880 ; SUP-9, NP\_494333 ; TWK-2, NP\_494786 ; TWK-3, NP\_495727 ; TWK-4, NP\_001343566 ; TWK-6, NP\_497973 ; TWK-7, NP\_498903 ; TWK-8, NP\_001023596 ; TWK-9, NP\_501724 ; TWK-10, NP\_001300134 ; TWK-11, NP\_001343632 ; TWK-12, NP\_505731 ; TWK-13, NP\_506091 ; TWK-14, NP\_001256414 ; TWK-16, NP\_508526 ; TWK-17, NP\_001024466 ; TWK-18, NP\_509516 ; TWK-20, NP\_510284 ; TWK-21, NP\_510654 ; TWK-22, NP\_510655 ; TWK-23, NP\_001257229 ; TWK-24, AAC32865 ; TWK-25, NP\_502170 ; TWK-26, NP\_508522 ; TWK-28, NP\_508732 ; TWK-29, NP\_001021467 ; TWK-30, NP\_492381 ; TWK-31, NP\_001022883 ; TWK-32, NP\_506416 ; TWK-33, NP\_001309463 ; TWK-34, NP\_506906 ; TWK-35, NP\_508031 ; TWK-36, NP\_507485 ; TWK-37, NP\_491810 ; TWK-39, NP\_001076639 ; TWK-40, NP\_001255207 ; TWK-42, NP\_507483 ; TWK-43, NP\_872137 ; TWK-44, NP\_509942 ; TWK-45, NP\_001122742 ; TWK-46, NP\_741678 ; TWK-48, NP\_001022681 ; ORK1/KCNK0, NP\_511112 ; dTask-6, NP\_001262539 ; dTask-7, NP\_649891 ; sandman, NP\_610349 ; CG10864, NP\_650726 ; CG34396, NP\_001097392 ; CG43155, NP\_572720 ; Galene, NP\_612084.

# Supplementary Figure 2

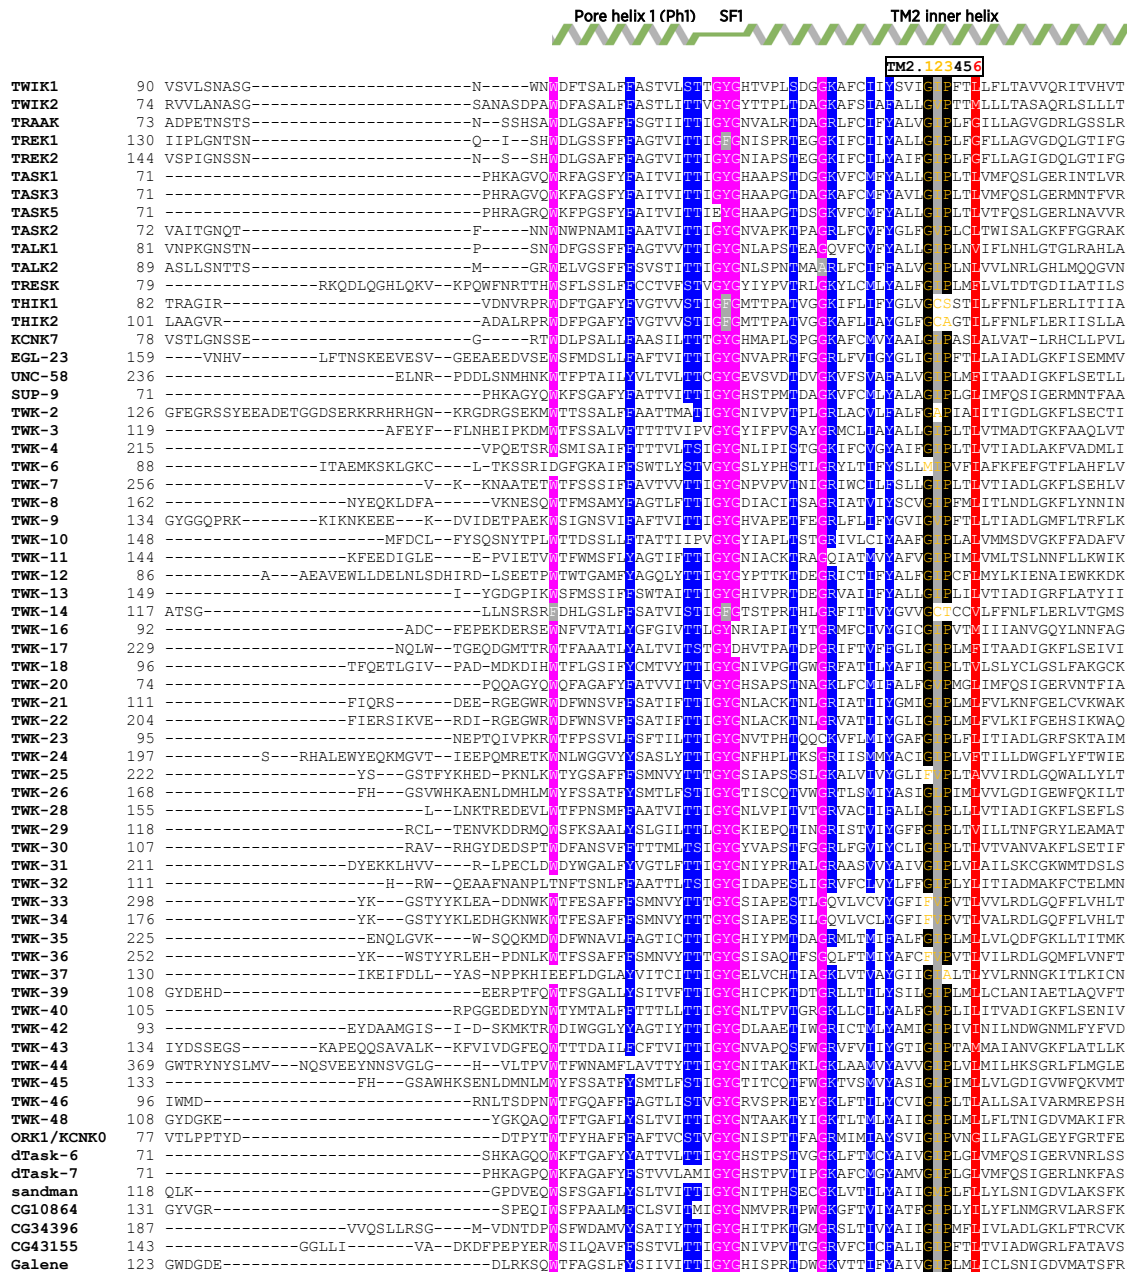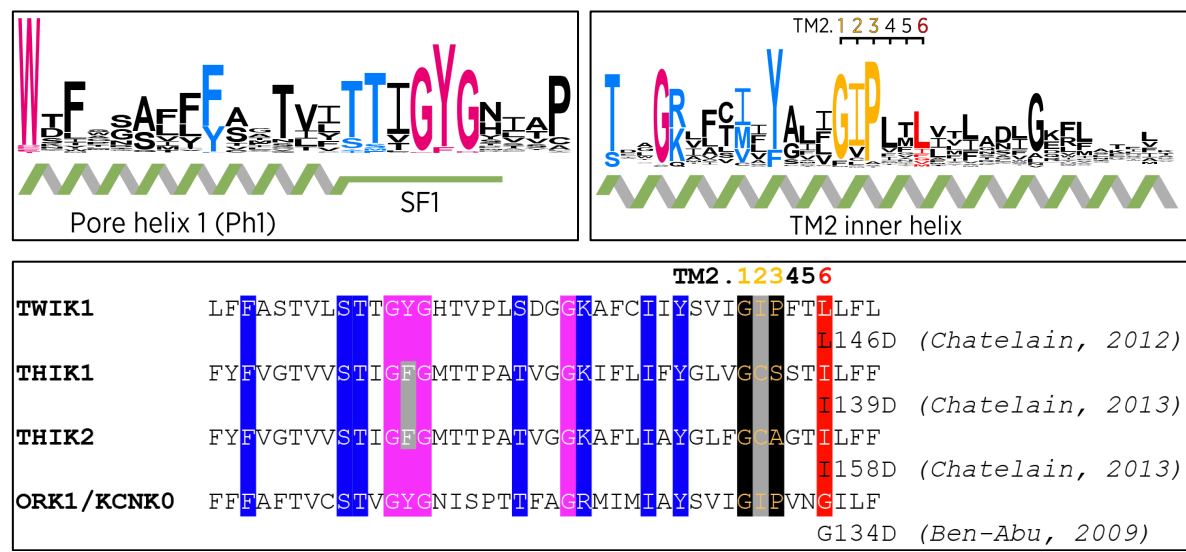

Previously published gain-of-function mutants of TM2.6 (see manuscript for references).



# Supplementary Figure 2

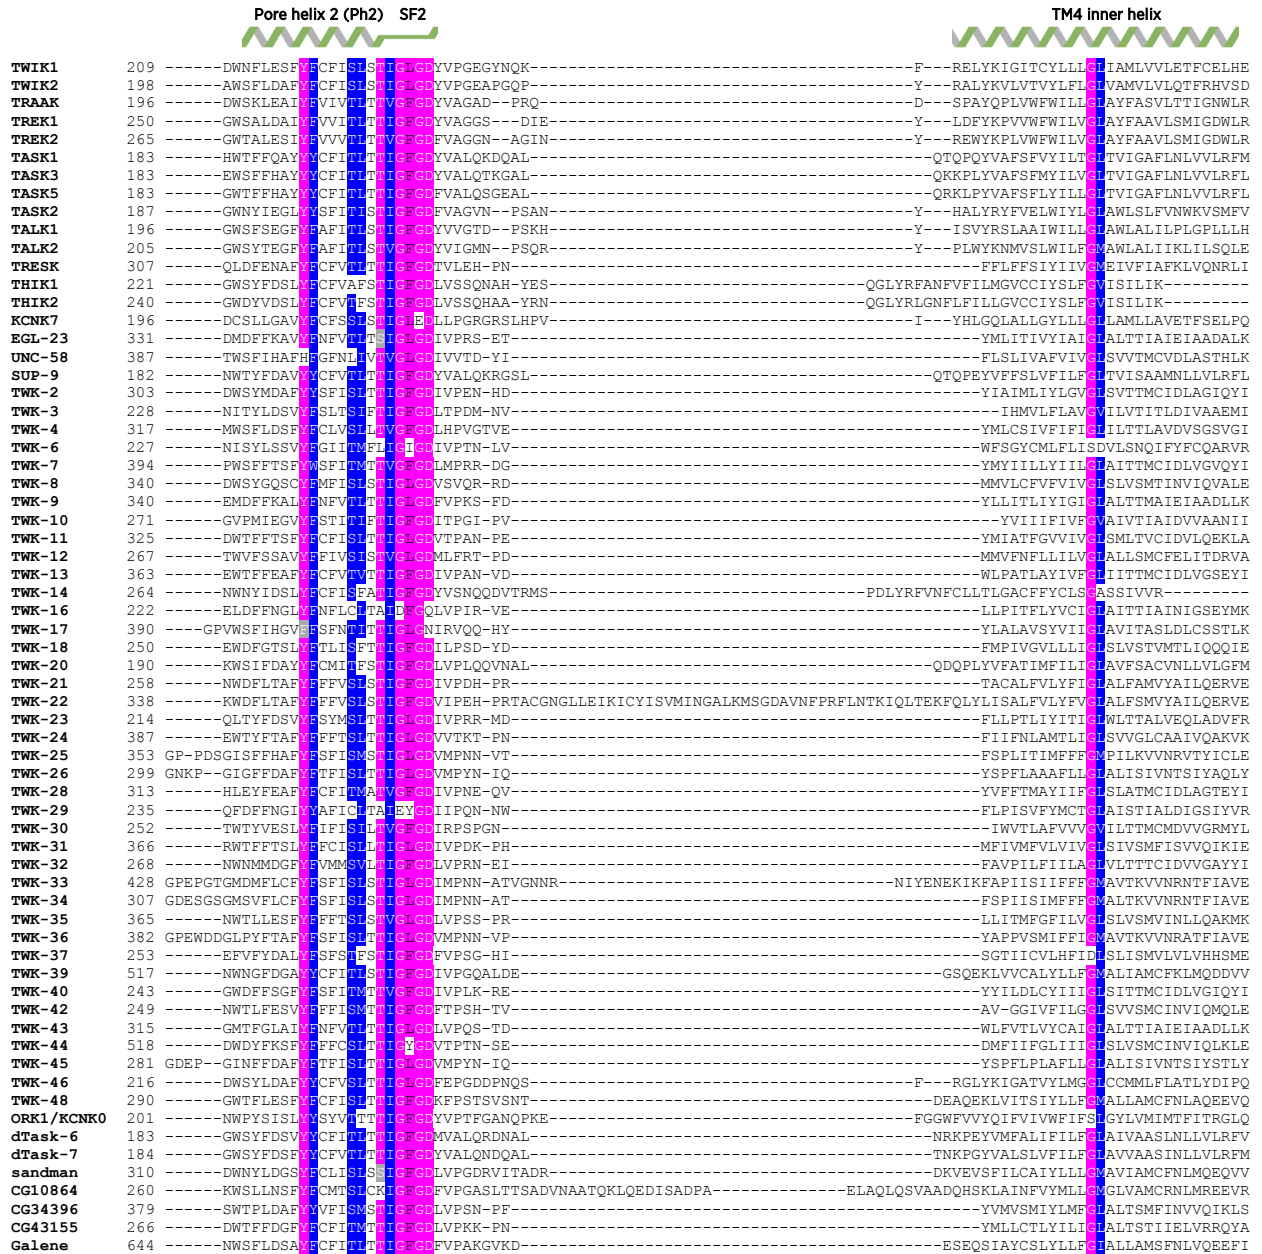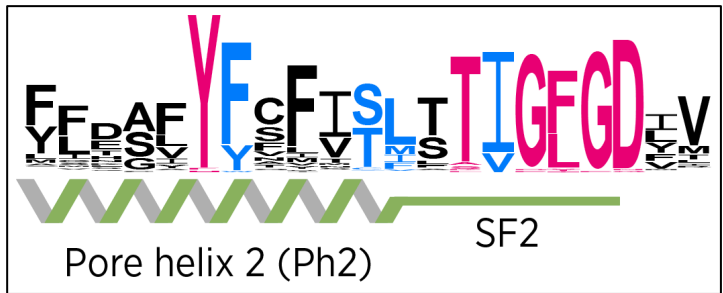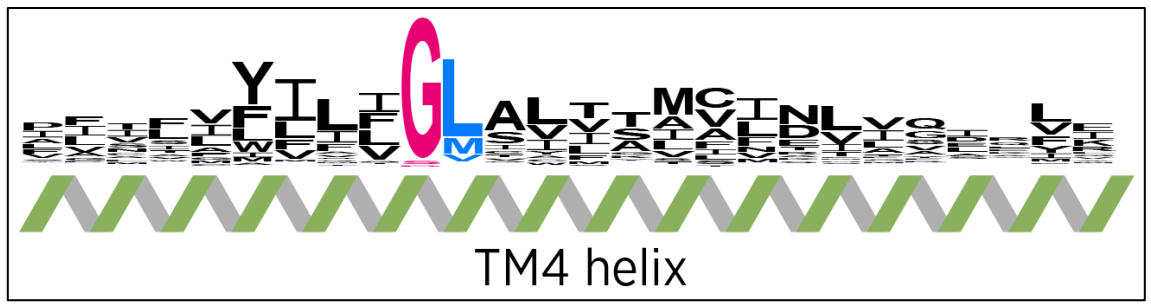

### Supplementary Figure 3

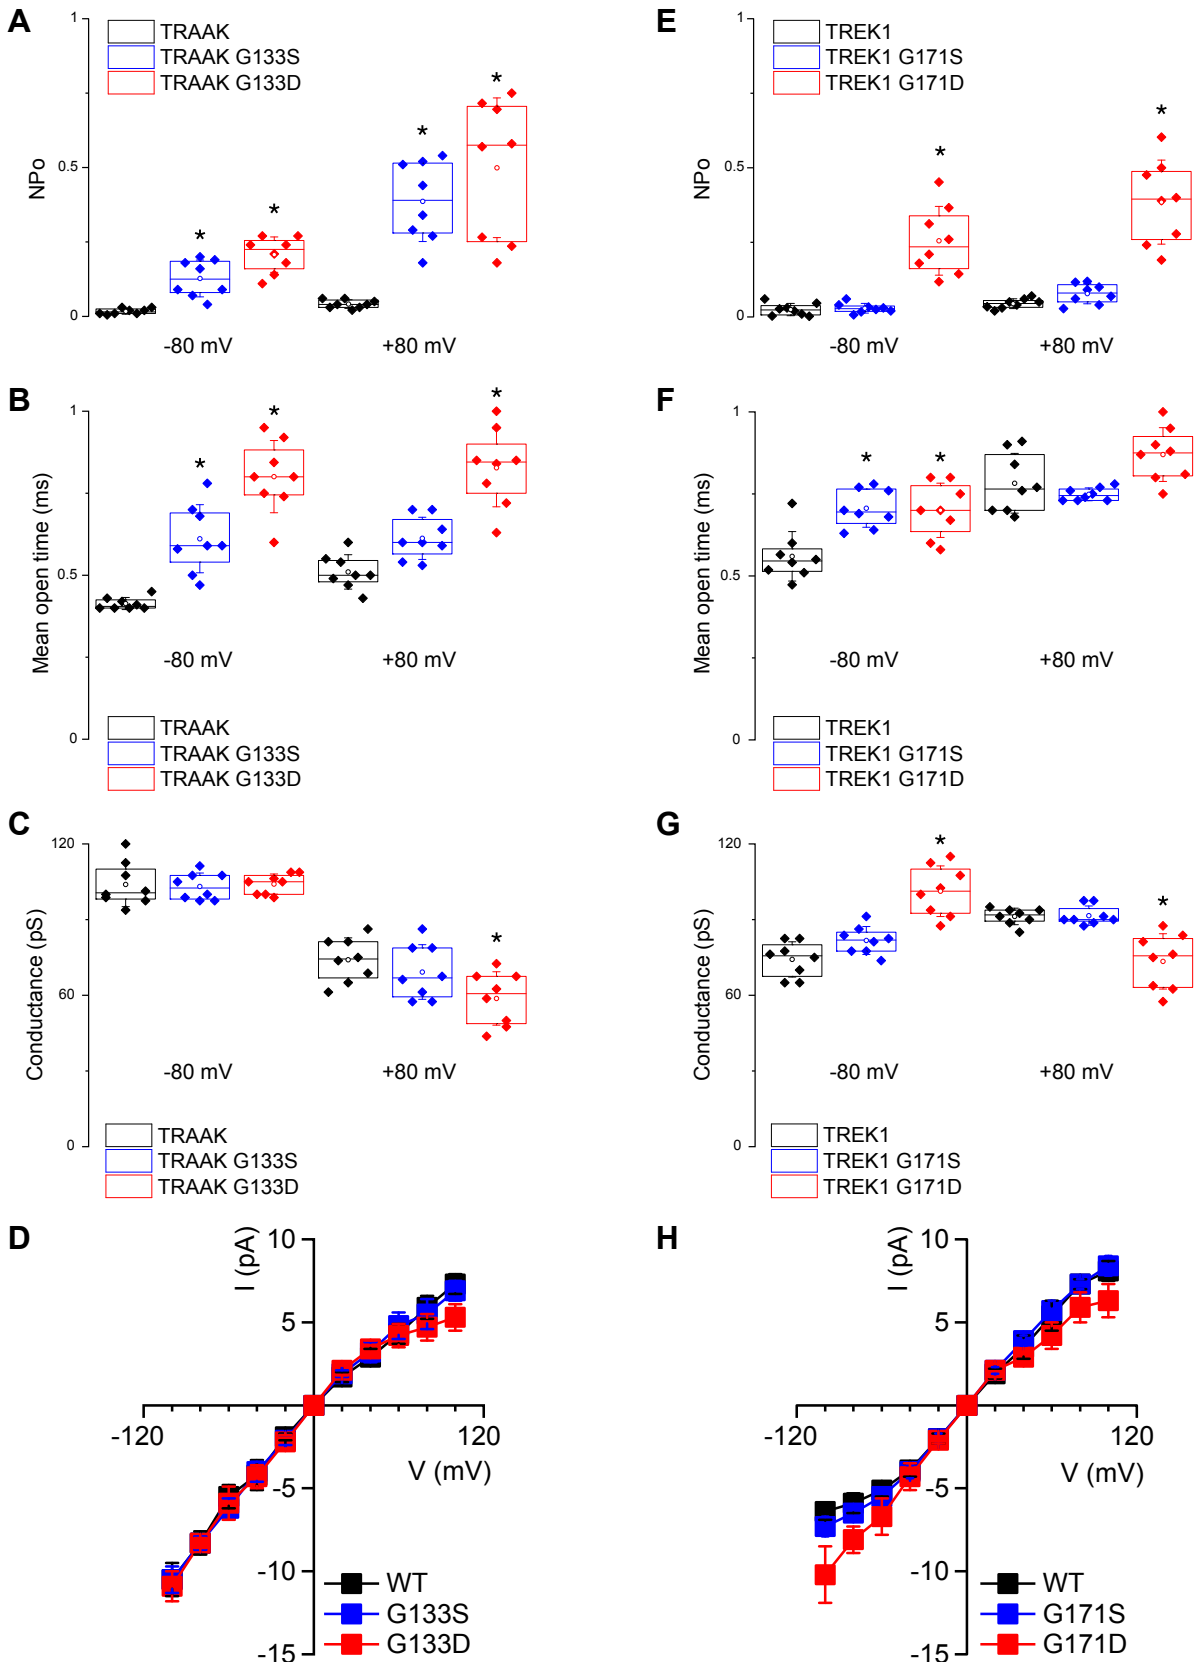

#### Single channel properties of TRAAK and TREK1 TM2.6 mutants

(A) TRAAK, TRAAK G133S, TRAAK G133D, (E) TREK1, TREK1 G171S, and TREK1 G171D channel activity determined by NPo analysis at -80 and +80 mV.

(B), (F) Mean open times were obtained from channel openings recorded at -80 mV and +80 mV.

(C), (G) Unitary conductances obtained from channel openings recorded at -80 mV and +80 mV.

(D), (H) Current-voltage relationships of single channels.

Center lines, medians; open circles, means; box limits, 25th and 75th percentiles; whiskers, standard deviation.

Kruskal-Wallis, Dunn's multiple comparison test, \*  $p < 0.05$ .



**Supplementary Table 1: Two-electrode voltage-clamp experiments (Figure 1B)**

| Channel    | TM2.6 | cRNA   | Day | $E_{rev}$ (mV)  | $I$ ( $\mu$ A) at 0 mV |
|------------|-------|--------|-----|-----------------|------------------------|
| hTWIK1     | WT    | 10 ng  | 1   | $-38.1 \pm 2.4$ | 0.2                    |
|            | L146N |        |     | $-88.4 \pm 1$   | $2.7 \pm 0.2$          |
| rTWIK2     | WT    | 10 ng  | 1   | $-33.1 \pm 1.1$ | 0.1                    |
|            | M135D |        |     | $-66.4 \pm 2.2$ | 0.4                    |
| hTASK1     | WT    | 0.8 ng | 3   | $-63.4 \pm 2.5$ | $0.7 \pm 0.1$          |
|            | L122N |        |     | $-71.0 \pm 1.1$ | $13.4 \pm 2$           |
| hTASK3     | WT    | 50 pg  | 1   | $-73.4 \pm 4.3$ | $1.8 \pm 0.3$          |
|            | L122N |        |     | $-77.6 \pm 2.5$ | $5 \pm 0.8$            |
| mTREK1     | WT    | 1 ng   | 1   | $-66.1 \pm 1.5$ | $0.7 \pm 0.1$          |
|            | G171D |        |     | $-72.0 \pm 0.6$ | $8.8 \pm 0.8$          |
| mTREK2     | WT    | 1 ng   | 2   | $-52.5 \pm 2$   | $0.5 \pm 0.1$          |
|            | G196D |        |     | $-72.1 \pm 0.9$ | $1.7 \pm 0.2$          |
| mTRAAK     | WT    | 1 ng   | 2   | $-55.6 \pm 1.5$ | 0.3                    |
|            | G133D |        |     | $-65.8 \pm 0.8$ | $32.9 \pm 7.2$         |
| mTRESK     | WT    | 1 ng   | 1   | $-70.8 \pm 1.1$ | $0.9 \pm 0.1$          |
|            | F156N |        |     | $-68.9 \pm 2$   | $24.3 \pm 3.6$         |
| mTASK2     | WT    | 5 ng   | 1   | $-87.5 \pm 2.8$ | $3.8 \pm 0.6$          |
|            | L127N |        |     | $-90.3 \pm 6.6$ | $14.2 \pm 1.6$         |
| hTALK1     | WT    | 20 ng  | 1   | $-80.5 \pm 3.9$ | $1 \pm 0.1$            |
|            | V137N |        |     | $-93.6 \pm 2.2$ | $2.9 \pm 0.2$          |
| hTALK2     | WT    | 20 ng  | 1   | $-42.4 \pm 2.1$ | 0.3                    |
|            | L145N |        |     | $-51.4 \pm 3.5$ | $1.4 \pm 0.1$          |
| hTHIK2     | WT    | 50 ng  | 2   | $-31.1 \pm 5.1$ | 0.1                    |
|            | I158D |        |     | $-83.3 \pm 0.9$ | 1                      |
| hTASK2     | WT    | 10 ng  | 1   | $-77.4 \pm 2.7$ | 0.4                    |
|            | L127N |        |     | $-93.4 \pm 0.6$ | $6.8 \pm 0.2$          |
| rTWIK2 LY  | WT    | 10 ng  | 1   | $-84.3 \pm 0.8$ | $2.2 \pm 0.1$          |
|            | M135D |        |     | $-79.9 \pm 0.8$ | $8.5 \pm 0.2$          |
| hTWIK1 AA  | WT    | 10 ng  | 1   | $-71.7 \pm 4$   | 0.4                    |
|            | L146N |        |     | $-85.1 \pm 0.9$ | $9.3 \pm 0.4$          |
| hTHIK2 5RA | WT    | 15 ng  | 1   | $-31.2 \pm 1.4$ | 0.2                    |
|            | I158N |        |     | $-76.5 \pm 1$   | $1.7 \pm 0.2$          |

**Supplementary Table 2: Strain list**

| <b>Strain</b> | <b>Genotype</b>               | <b>Description</b>       |
|---------------|-------------------------------|--------------------------|
| JIP1658       | <i>egl-23(bln309) V</i>       | EGL-23-wrmScarlet        |
| JIP1506       | <i>egl-23(bln309bln334) V</i> | EGL-23(L229N)-wrmScarlet |
| JIP1559       | <i>egl-23(bln309bln359) V</i> | EGL-23(L229S)-wrmScarlet |
| JIP1620       | <i>unc-58(bln448) X</i>       | UNC-58(F294S)            |
| JIP1621       | <i>unc-58(bln449) X</i>       | UNC-58(F294T)            |
| JIP1622       | <i>unc-58(bln450) X</i>       | UNC-58(F294N)            |
| JIP1623       | <i>twk-18(bln451) X</i>       | TWK-18(V158N)            |
| JIP1636       | <i>twk-18(bln458) X</i>       | TWK-18(V158S)            |
| JIP1706       | <i>twk-18(bln491) X</i>       | TWK-18(V158T)            |
| JIP1677       | <i>sup-9(bln476) II</i>       | SUP-9(L122S)             |

**Supplementary Table 3: List of single strand oligonucleotides (DNA and RNA) for CRISPR/Cas9 genome engineering**

|                                      | <b>Sequence (5' to 3')</b>                                                                                            | <b>Description</b>                            |
|--------------------------------------|-----------------------------------------------------------------------------------------------------------------------|-----------------------------------------------|
| <b>crRNA</b><br><b><i>unc-58</i></b> | gcggcagugauagacauuag                                                                                                  | Use to generate UNC-58 (F294x)                |
| oPT271                               | cggaaagggttttctcagtagcattcgcgcttggttggtataccactAatgtCTatCacTgcCgccgatattggtaaa<br>tttttatctgaaacattactccagtttgtgagct  | Repair template (Ultramer) for UNC-58 (F294S) |
| oPT273                               | tcggaaagggttttctcagtagcattcgcgcttggttggtataccactAatgACAATacTgcCgccgatattggtaa<br>atttttatctgaaacattactccagtttgtgagctt | Repair template (Ultramer) for UNC-58 (F294T) |
| oPT275                               | tcggaaagggttttctcagtagcattcgcgcttggttggtataccactAatgAAATacTgcCgccgatattggtaa<br>atttttatctgaaacattactccagtttgtgagctt  | Repair template (Ultramer) for UNC-58 (F294N) |
| <b>crRNA</b><br><b><i>egl-23</i></b> | ugguauuccguuuacacugc                                                                                                  | Use to generate EGL-23 (L229x)                |
| oSEM402                              | ttcgcctccaccatcatttctgatatgaattttccgagatctgcaattgcTagACTtgtaaacggaataccaatta<br>gaccataaccaatgacaaatagacggccac        | Repair template (Ultramer) for EGL-23 (L229S) |
| oSEM356                              | ttcgcctccaccatcatttctgatatgaattttccgagatctgcaattgcTagGTTtgtaaacggaataccaatta<br>gaccataaccaatgacaaatagacggccac        | Repair template (Ultramer) for EGL-23 (L229N) |
| <b>crRNA</b><br><b><i>twk-18</i></b> | uaaagacugagcacugugag                                                                                                  | Use to generate TWK-18 (V158x)                |
| oSEM435                              | ctggatggggtcgttttgctactatcctttacgcattcattggaattccaTtGacaAACTTAAgtTtGtactgtct<br>tggtagtctttttgccaagggatg              | Repair template (Ultramer) for TWK-18 (V158N) |
| oSEM436                              | ctggatggggtcgttttgctactatcctttacgcattcattggaattccaTtGacaAGTTTAAgtTtGtactgtct<br>tggtagtctttttgccaagggatg              | Repair template (Ultramer) for TWK-18 (V158S) |
| oSEM437                              | ctggatggggtcgttttgctactatcctttacgcattcattggaattccaTtGacaACTTTAAgtTtGtactgtct<br>tggtagtctttttgccaagggatg              | Repair template (Ultramer) for TWK-18 (V158T) |
| <b>crRNA</b><br><b><i>sup-9</i></b>  | cgcacuggcgggaauuccau                                                                                                  | Use to generate SUP-9 (L122x)                 |
| oNZ161                               | tggaactcctggaaaattttcagcaactcaccaatactctgaaacatgataTTtccTaGtggaaattcccgcagtg<br>cgtagagcatgcagaaaacttttccgg           | Repair template (Ultramer) for SUP-9 (L122N)  |
| oMG798                               | tggaactcctggaaaattttcagcaactcaccaatactctgaaacatgatGCTGccTaGtggaaattcccgcagtg<br>cgtagagcatgcagaaaacttttccgg           | Repair template (Ultramer) for SUP-9 (L122S)  |

**Supplementary Table 4: Genotyping primer combinations for *C. elegans* mutants**

| <b>Allele</b>          | <b>Primer</b> | <b>Sequence (5' to 3')</b> | <b>Description</b>                                                                                                                                                       |
|------------------------|---------------|----------------------------|--------------------------------------------------------------------------------------------------------------------------------------------------------------------------|
| <i>unc-58</i><br>F294X | oTB522        | cggggtagtaatatggatgaagg    | 338bp PCR product; verify by sequencing.                                                                                                                                 |
|                        | oTB508        | ggaccacccggttgattgtaa      |                                                                                                                                                                          |
| <i>egl-23</i><br>L229X | oSEM357       | cccaccattaaccgagtttg       | 487bp PCR product digested by FspBI;<br>WT: 134/353bp<br>Mutant: 104/134/249bp                                                                                           |
|                        | oSEM358       | tcccagattataagcaggcaat     |                                                                                                                                                                          |
| <i>twk-18</i><br>V158X | oSEM430       | tgcggcgcttaagtatttg        | 673bp PCR product digested by RsaI;<br>WT: 673bp<br>Mutant: 384/289bp                                                                                                    |
|                        | oSEM431       | ggagatggggaaagacaaca       |                                                                                                                                                                          |
| <i>sup-9</i><br>L122X  | oMG850        | caactgtgataacgacgatcgg     | PCR oMG850-852-856:<br>WT: 986/324bp<br>L122N&L122S: 986bp<br>PCR oMG850-852-855<br>WT: 986bp<br>L122N: 986/324bp<br>PCR oMG850-852-853<br>WT: 986bp<br>L122S: 986/324bp |
|                        | oMG852        | caccgcgtcgaaatatgtcc       |                                                                                                                                                                          |
|                        | oMG853        | cgggaattccaCtAggCAGC       |                                                                                                                                                                          |
|                        | oMG855        | gcgggaattccaCtAggaAA       |                                                                                                                                                                          |
|                        | oMG856        | gcgggaattccaTtGggACT       |                                                                                                                                                                          |

**Supplementary Table 5: List of plasmids**

| Plasmid/<br>gene                      | Primer | Sequence (5' to 3')                                                     | Isothermal Ligation<br>with EcoRV digested<br>pTB207 and |                                        |                                        |                                      |
|---------------------------------------|--------|-------------------------------------------------------------------------|----------------------------------------------------------|----------------------------------------|----------------------------------------|--------------------------------------|
| pTB301/<br><i>TWK-18</i><br><i>WT</i> | oTB553 | ccactagtaacggccgcccagtgctggaa<br>ttctgcagatatggcgattggtgcaag            | oTB553-<br>554                                           | from<br>pOX_twk<br>-18 <sup>1</sup>    |                                        |                                      |
|                                       | oTB554 | cgggccccccctcgagcggccgcccagtgctg<br>atggatctagatgtcatgctctagat          |                                                          |                                        |                                        |                                      |
| pNZ19/<br><i>TWK-18</i><br>(V158D)    | oNZ52  | tgtgagtggaaattccaatga                                                   | oTB553-<br>oNZ52<br>oTB554-<br>oNZ53                     |                                        |                                        |                                      |
|                                       | oNZ53  | tgctactatcctttacgcattcattggaat<br>tccactcacaGACctcagtccttactgtct<br>tgg |                                                          |                                        |                                        |                                      |
| pTB314/<br><i>TWK-18</i><br>(M280I)   | oTB571 | actccaacaattggGATgaaatcgtaatcc<br>catattgataggactcgtgtattctccac         | oTB553-<br>oTB571<br>oTB554-<br>oTB572                   |                                        |                                        |                                      |
|                                       | oTB572 | ttgtgtcaat                                                              |                                                          |                                        |                                        |                                      |
| pOA23/<br><i>hTASK1</i><br><i>WT</i>  | oOA21  | ccactagtaacggccgcccagtgctggaa<br>ttctgcagatatgaagcggcagaacgtgcg         | oOA21-22                                                 |                                        | from<br>hTASK-<br>1-pSGEM <sup>2</sup> |                                      |
|                                       | oOA22  | agctcgggccccccctcgagcggccgcccag<br>tgtgatggattcacacggagctcctgcgct       |                                                          |                                        |                                        |                                      |
| pOA24/<br><i>hTASK1</i><br>(L122N)    | oOA23  | ctggaacatgacATTcgtgagcgggatgcc                                          | oOA21-23<br>oOA24-22                                     |                                        |                                        |                                      |
|                                       | oOA24  | ggcatcccgcctcacgAATgtcatgttccag                                         |                                                          |                                        |                                        |                                      |
| pOA21/<br><i>hTASK3</i><br><i>WT</i>  | oOA18  | ccactagtaacggccgcccagtgctggaa<br>ttctgcagatatgaagaggcagaacgtgcg         | oOA18-<br>oIS17                                          | from<br>hTASK-<br>3-pSGEM <sup>2</sup> |                                        |                                      |
|                                       | oIS17  | agctcgggccccccctcgagcggccgcccag<br>tgtgatggatctaaacggacttccggcggt       |                                                          |                                        |                                        |                                      |
| pOA22/<br><i>hTASK3</i><br>(L122N)    | oOA26  | gctctggaacatgacATTtgtcagcgggat                                          | oOA18-26<br>oIS17-<br>oOA25                              |                                        |                                        |                                      |
|                                       | oOA25  | atcccgcctgacaAATgtcatgttccagagc                                         |                                                          |                                        |                                        |                                      |
| pOA25/<br><i>mTASK2</i><br><i>WT</i>  | oNZ56  | ccactagtaacggccgcccagtgctggaa<br>ttctgcagatatggtggaccggggtccttt         | oNZ56-57                                                 |                                        |                                        | from<br>pTLN<br>mTASK-2 <sup>3</sup> |
|                                       | oNZ57  | agctcgggccccccctcgagcggccgcccag<br>tgtgatggattcacgtgcccctgggggta        |                                                          |                                        |                                        |                                      |
| pNZ20/<br><i>mTASK2</i><br>(L127N)    | oNZ55  | gcacagcggcaccggaaga                                                     | oNZ56-55<br>oNZ54-57                                     |                                        |                                        |                                      |
|                                       | oNZ54  | ctgtgtcttctacggcctcttcgggggtgcc<br>gctgtgcAACacatggatcagtgccctggg       |                                                          |                                        |                                        |                                      |
| pOA26/<br><i>mTREK2</i><br><i>WT</i>  | oOA30  | ccactagtaacggccgcccagtgctggaa<br>ttctgcagatatgaaatttccaatcgagac         | oOA30-31                                                 |                                        | from<br>mTREK2c<br>-pEXO               |                                      |
|                                       | oOA31  | agctcgggccccccctcgagcggccgcccag<br>tgtgatggatttagtttctgtcttcaagta       |                                                          |                                        |                                        |                                      |
| pOA27/<br><i>mTREK2</i><br>(G196D)    | oOA43  | tccagccaataagaaATCaaaaagcgggat                                          | oOA30-43<br>oOA42-31                                     |                                        |                                        |                                      |
|                                       | oOA42  | atcccgcctttttGATtcttattggctgga                                          |                                                          |                                        |                                        |                                      |
| pOA28/<br><i>mTRAAK</i><br><i>WT</i>  | oOA34  | ccactagtaacggccgcccagtgctggaa<br>ttctgcagatatgcgagcaccacactcct          | oOA34-35                                                 | from<br>mTRAAK-<br>pEXO                |                                        |                                      |
|                                       | oOA35  | agctcgggccccccctcgagcggccgcccag<br>tgtgatggatctacaccggcacggccttgt       |                                                          |                                        |                                        |                                      |
| pOA29/<br><i>mTRAAK</i><br>(G133D)    | oOA45  | tcccgcagcagcatATCgaacagtgggat                                           | oOA34-45<br>oOA44-35                                     |                                        |                                        |                                      |
|                                       | oOA44  | atcccactgttcGATatgctgctggcggga                                          |                                                          |                                        |                                        |                                      |

|                                             |       |                                                                 |                      |                                 |
|---------------------------------------------|-------|-----------------------------------------------------------------|----------------------|---------------------------------|
| pOA30/<br><i>mTRESK</i><br><i>WT</i>        | oOA38 | ccactagtaacggccgcccagtgctggaa<br>ttctgcagatatggaggctgaggagccacc | oOA38-39             | from<br><i>mTRESK</i> -<br>pEXO |
|                                             | oOA39 | agctcgggccccccctcgagcggccgcccag<br>tgtgatggatttaccaggtagcgaactt |                      |                                 |
| pOA31/<br><i>mTRESK</i><br>( <i>F156N</i> ) | oOA41 | gtctgtgaggaccagATTcattagaggat                                   | oOA38-41<br>oOA40-39 |                                 |
|                                             | oOA40 | atccctctaataatgAATctggtcctcacagac                               |                      |                                 |
|                                             | oTB   |                                                                 |                      |                                 |

<sup>1</sup> purchased from addgene

<sup>2</sup> kindly provided by V.K. Renigunta

<sup>3</sup> kindly provided by F.V. Sepúlveda
